# Supplementary material for: Statistical Characterization of Food-Derived α-Amylase Inhibitory Peptides: Computer Simulation and Partial Least Squares Regression Analysis
Source: MDPI journal article supplement (doi:10.3390/molecules29020395), 2024-01-13
Supplement: s1 [file s1]

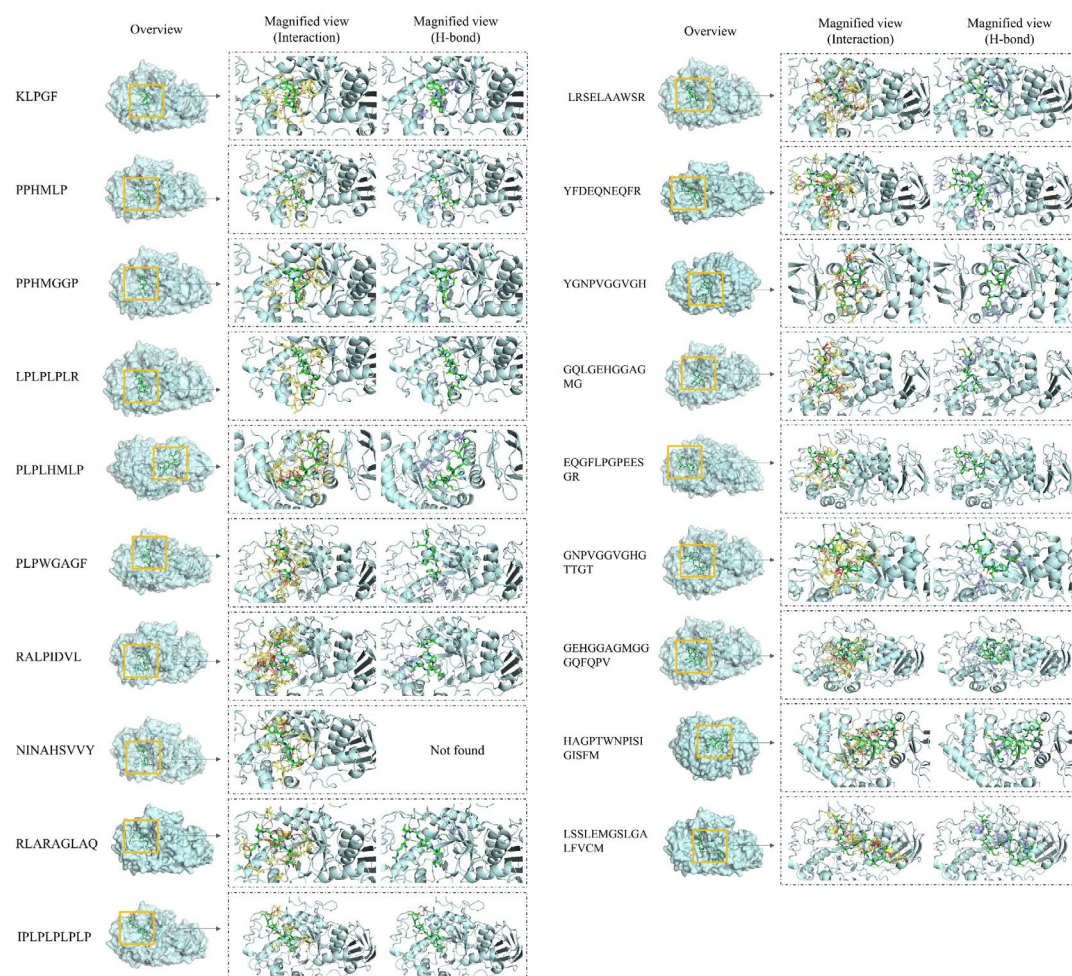

**Figure S1.** Molecular docking results for all twenty peptides with  $\alpha$ -amylase include binding poses (left panel) as well as interactions (middle panel) and formation of hydrogen bonds (right panel). Blue molecules represent  $\alpha$ -amylase, green molecules are peptide fragments, yellow molecules represent amino acids on  $\alpha$  amylase that interact with peptide segments, red dashed lines indicate interactions, purple molecules represent amino acids on  $\alpha$  amylase that form hydrogen bonds with the peptide segment, and yellow dashed lines indicate interactions.

**Table S1.** Molecular docking results of twenty inhibitory peptides and  $\alpha$ -amylase.

| Peptide  | Mode | Affinity<br>kcal/mol | Dist from best<br>mode |              | Peptide       | Mode | Affinity<br>kcal/mol | Dist from best<br>mode |              |
|----------|------|----------------------|------------------------|--------------|---------------|------|----------------------|------------------------|--------------|
|          |      |                      | Rmsd<br>l.b.           | Rmsd<br>u.b. |               |      |                      | Rmsd<br>l.b.           | Rmsd<br>u.b. |
| EAGVD    | 1    | -6.4                 | 0.0                    | 0.0          | PLPLH<br>MLP  | 1    | -7.5                 | 0.0                    | 0.0          |
|          | 2    | -6.3                 | 28.1                   | 30.6         |               | 2    | -7.5                 | 2.9                    | 6.1          |
|          | 3    | -6.3                 | 27.7                   | 30.8         |               | 3    | -7.5                 | 3.7                    | 11.5         |
|          | 4    | -6.3                 | 5.5                    | 8.9          |               | 4    | -7.4                 | 31.3                   | 34.1         |
|          | 5    | -6.2                 | 27.9                   | 30.7         |               | 5    | -7.3                 | 30.4                   | 32.8         |
|          | 6    | -6.1                 | 28.8                   | 31.5         |               | 6    | -7.2                 | 2.0                    | 4.2          |
|          | 7    | -6.1                 | 4.4                    | 9.0          |               | 7    | -7.2                 | 3.8                    | 12.2         |
|          | 8    | -6.1                 | 5.3                    | 7.9          |               | 8    | -7.2                 | 30.9                   | 33.6         |
|          | 9    | -6.0                 | 28.6                   | 30.7         |               | 9    | -7.1                 | 1.6                    | 2.2          |
| KLPGF    | 1    | -6.9                 | 0.0                    | 0.0          | PLPWG<br>AGF  | 1    | -8.7                 | 0.0                    | 0.0          |
|          | 2    | -6.5                 | 3.5                    | 7.2          |               | 2    | -8.5                 | 3.3                    | 11.7         |
|          | 3    | -6.4                 | 2.7                    | 5.8          |               | 3    | -8.2                 | 3.1                    | 12.6         |
|          | 4    | -6.4                 | 2.4                    | 5.2          |               | 4    | -8.0                 | 5.5                    | 8.5          |
|          | 5    | -6.4                 | 2.3                    | 6.5          |               | 5    | -7.6                 | 32.1                   | 37.3         |
|          | 6    | -6.3                 | 27.0                   | 29.5         |               | 6    | -7.6                 | 5.1                    | 9.6          |
|          | 7    | -6.2                 | 2.4                    | 6.1          |               | 7    | -7.5                 | 31.9                   | 37.0         |
|          | 8    | -6.1                 | 27.9                   | 29.6         |               | 8    | -7.4                 | 31.4                   | 36.7         |
|          | 9    | -6.0                 | 4.9                    | 8.5          |               | 9    | -7.4                 | 3.3                    | 11.6         |
| PPHMLP   | 1    | -7.5                 | 0.0                    | 0.0          | RALPID<br>VL  | 1    | -7.3                 | 0.0                    | 0.0          |
|          | 2    | -7.0                 | 27.3                   | 29.9         |               | 2    | -7.3                 | 6.1                    | 11.8         |
|          | 3    | -6.8                 | 27.3                   | 30.0         |               | 3    | -7.0                 | 3.8                    | 7.3          |
|          | 4    | -6.7                 | 28.2                   | 30.2         |               | 4    | -7.0                 | 29.9                   | 32.0         |
|          | 5    | -6.7                 | 7.3                    | 12.2         |               | 5    | -6.9                 | 30.0                   | 32.5         |
|          | 6    | -6.6                 | 27.5                   | 29.9         |               | 6    | -6.8                 | 29.6                   | 32.2         |
|          | 7    | -6.5                 | 28.0                   | 29.6         |               | 7    | -6.8                 | 4.2                    | 11.2         |
|          | 8    | -6.5                 | 3.7                    | 5.8          |               | 8    | -6.5                 | 3.8                    | 7.7          |
|          | 9    | -6.5                 | 3.6                    | 7.0          |               | 9    | -6.5                 | 29.9                   | 33.0         |
| PPHMGGP  | 1    | -7.8                 | 0.0                    | 0.0          | NINAH<br>SVVY | 1    | -7.4                 | 0.0                    | 0.0          |
|          | 2    | -7.4                 | 28.6                   | 30.8         |               | 2    | -7.4                 | 1.3                    | 2.2          |
|          | 3    | -7.2                 | 5.6                    | 9.9          |               | 3    | -7.4                 | 29.5                   | 33.4         |
|          | 4    | -7.0                 | 4.5                    | 9.8          |               | 4    | -7.1                 | 1.8                    | 3.0          |
|          | 5    | -6.9                 | 2.9                    | 9.1          |               | 5    | -7.1                 | 29.6                   | 33.8         |
|          | 6    | -6.9                 | 29.3                   | 31.3         |               | 6    | -7.0                 | 2.6                    | 3.9          |
|          | 7    | -6.9                 | 28.8                   | 31.6         |               | 7    | -6.9                 | 33.3                   | 37.0         |
|          | 8    | -6.8                 | 29.0                   | 31.4         |               | 8    | -6.9                 | 4.4                    | 10.6         |
|          | 9    | -6.8                 | 28.9                   | 31.6         |               | 9    | -6.8                 | 29.3                   | 32.5         |
| LPLPLPLR | 1    | -7.5                 | 0.0                    | 0.0          | RLARA<br>GLAQ | 1    | -6.5                 | 0.0                    | 0.0          |
|          | 2    | -7.4                 | 1.8                    | 3.7          |               | 2    | -6.5                 | 2.8                    | 6.7          |
|          | 3    | -7.3                 | 5.9                    | 13.6         |               | 3    | -6.5                 | 3.1                    | 5.8          |

|                |   |      |      |      |        |   |      |      |      |
|----------------|---|------|------|------|--------|---|------|------|------|
|                | 4 | -7.2 | 27.3 | 31.7 |        | 4 | -6.4 | 2.7  | 12.9 |
|                | 5 | -7.2 | 2.3  | 14.2 |        | 5 | -6.4 | 5.3  | 9.2  |
|                | 6 | -7.2 | 27.2 | 31.1 |        | 6 | -6.3 | 5.3  | 9.5  |
|                | 7 | -7.1 | 3.7  | 8.3  |        | 7 | -6.2 | 2.5  | 12.3 |
|                | 8 | -7.1 | 27.0 | 31.3 |        | 8 | -6.2 | 34.2 | 38.1 |
|                | 9 | -7.0 | 27.4 | 31.5 |        | 9 | -6.2 | 34.6 | 37.8 |
|                | 1 | -7.8 | 0.0  | 0.0  |        | 1 | -8.5 | 0.0  | 0.0  |
|                | 2 | -7.6 | 35.0 | 39.2 |        | 2 | -8.3 | 2.5  | 3.9  |
|                | 3 | -7.6 | 4.1  | 7.6  |        | 3 | -8.1 | 31.6 | 37.1 |
| IPLPLPLP<br>LP | 4 | -7.6 | 6.0  | 11.7 | EQGFL  | 4 | -7.7 | 32.3 | 37.7 |
|                | 5 | -7.6 | 6.1  | 11.3 | PGPEES | 5 | -7.7 | 32.3 | 38.1 |
|                | 6 | -7.5 | 8.7  | 18.3 | GR     | 6 | -7.6 | 3.9  | 9.6  |
|                | 7 | -7.4 | 7.1  | 17.3 |        | 7 | -7.2 | 29.7 | 35.8 |
|                | 8 | -7.4 | 4.2  | 8.7  |        | 8 | -7.2 | 8.7  | 15.5 |
|                | 9 | -7.4 | 35.2 | 39.4 |        | 9 | -7.1 | 3.3  | 6.7  |
|                | 1 | -6.7 | 0.0  | 0.0  |        | 1 | -7.8 | 0.0  | 0.0  |
|                | 2 | -6.5 | 30.4 | 33.6 |        | 2 | -7.7 | 3.9  | 7.4  |
|                | 3 | -6.5 | 29.9 | 32.8 |        | 3 | -7.7 | 29.8 | 34.9 |
| LRSELAA<br>WSR | 4 | -6.4 | 30.0 | 33.7 | GNPVG  | 4 | -7.6 | 30.7 | 33.9 |
|                | 5 | -6.3 | 29.8 | 33.8 | GVGH   | 5 | -7.6 | 30.4 | 35.4 |
|                | 6 | -6.3 | 30.5 | 33.5 | GTTGT  | 6 | -7.5 | 3.5  | 6.5  |
|                | 7 | -6.3 | 29.8 | 34.6 |        | 7 | -7.5 | 30.6 | 34.8 |
|                | 8 | -6.3 | 30.1 | 33.8 |        | 8 | -7.3 | 5.4  | 12.3 |
|                | 9 | -6.2 | 3.0  | 7.5  |        | 9 | -7.3 | 3.1  | 8.7  |
|                | 1 | -7.1 | 0.0  | 0.0  |        | 1 | -7.3 | 0.0  | 0.0  |
|                | 2 | -6.9 | 1.9  | 5.0  |        | 2 | -7.3 | 31.0 | 36.2 |
|                | 3 | -6.8 | 3.5  | 8.4  |        | 3 | -7.2 | 31.2 | 37.3 |
| YFDEQNE<br>QFR | 4 | -6.8 | 6.0  | 11.7 | GEHGG  | 4 | -7.1 | 35.0 | 42.1 |
|                | 5 | -6.7 | 32.6 | 36.9 | AGMG   | 5 | -7.0 | 32.2 | 36.9 |
|                | 6 | -6.7 | 6.1  | 11.6 | GGQFQ  | 6 | -7.0 | 30.9 | 35.0 |
|                | 7 | -6.6 | 33.6 | 37.7 | PV     | 7 | -7.0 | 39.3 | 45.3 |
|                | 8 | -6.5 | 5.6  | 14.2 |        | 8 | -7.0 | 30.6 | 35.0 |
|                | 9 | -6.5 | 2.6  | 6.6  |        | 9 | -6.9 | 30.9 | 35.3 |
|                | 1 | -7.0 | 0.0  | 0.0  |        | 1 | -7.0 | 0.0  | 0.0  |
|                | 2 | -6.9 | 9.9  | 15.3 |        | 2 | -6.8 | 3.8  | 9.0  |
|                | 3 | -6.8 | 29.8 | 34.3 |        | 3 | -6.8 | 3.8  | 14.0 |
| YGNPVGG<br>VGH | 4 | -6.8 | 32.9 | 37.4 | HAGPT  | 4 | -6.8 | 33.0 | 37.3 |
|                | 5 | -6.6 | 30.8 | 35.0 | WNPISI | 5 | -6.8 | 28.2 | 32.6 |
|                | 6 | -6.6 | 30.8 | 35.0 | GISFM  | 6 | -6.8 | 1.7  | 2.3  |
|                | 7 | -6.6 | 10.0 | 15.5 |        | 7 | -6.7 | 32.1 | 37.1 |
|                | 8 | -6.4 | 31.6 | 36.0 |        | 8 | -6.5 | 3.4  | 14.0 |
|                | 9 | -6.4 | 29.1 | 32.5 |        | 9 | -6.5 | 1.9  | 3.0  |
| GQLGEHG        | 1 | -7.0 | 0.0  | 0.0  |        | 1 | -7.1 | 0.0  | 0.0  |
| GAGMG          | 2 | -7.0 | 35.0 | 39.2 |        | 2 | -6.8 | 1.8  | 2.1  |

|   |      |      |      |        |   |      |      |      |
|---|------|------|------|--------|---|------|------|------|
| 3 | -7.0 | 31.4 | 34.4 |        | 3 | -6.8 | 1.7  | 2.1  |
| 4 | -7.0 | 31.4 | 34.8 |        | 4 | -6.4 | 29.6 | 36.6 |
| 5 | -6.9 | 35.0 | 39.1 | LSSLEM | 5 | -6.2 | 27.1 | 30.4 |
| 6 | -6.9 | 34.2 | 38.2 | GSLGA  | 6 | -6.2 | 28.0 | 32.9 |
| 7 | -6.8 | 1.3  | 2.3  | LFVCM  | 7 | -6.1 | 26.8 | 31.7 |
| 8 | -6.8 | 31.3 | 34.8 |        | 8 | -6.1 | 29.4 | 36.6 |
| 9 | -6.7 | 31.1 | 34.2 |        | 9 | -6.1 | 27.9 | 32.0 |

**Table S2.** Residues on the  $\alpha$ -amylase molecule that interact with the peptides.

| Peptide          | The sites on the enzyme molecule where the interactions occur                                                                       |
|------------------|-------------------------------------------------------------------------------------------------------------------------------------|
| EAGVD            | Trp58, Tyr62, Gln63, Arg195, Asp197, His201, His299, Asp300, His305                                                                 |
| KLPGF            | Tyr62, His101, Leu162, Val163, Arg195, Asp197, Ala198, Lys200, His201, Glu233, Ile235, His299, Asp300, His305                       |
| PPHMLP           | Gln63, Tyr151, Leu162, Arg195, Lys200, His201, Glu233, Glu240, His299, Gly308                                                       |
| PPHMGGP          | Gln63, His101, Leu162, Arg195, His201, Glu233, His299, His305, Asp356                                                               |
| LPLPLPLR         | Tyr62, Gln63, Tyr151, Asn152, Leu162, Lys200, His201, Glu233, Ile235, Glu240, Ala241, His299, Asp300, His305, Gly306                |
| PLPLHMLP         | Tyr2, Thr6, Gly9, Arg252, Trp280, Glu282, Ser289, Arg291, His331, Pro332, Phe335, Arg398, Asp402, Phe406, Arg421                    |
| PLPWGAGF         | Trp59, Gln63, Tyr151, Val163, Arg195, Asp197, Ala198, His201, Glu233, His299, Asp300, His305, Glu352, Trp357                        |
| RALPIDVL         | Trp58, Trp59, Gln63, His101, Ile148, Tyr151, Gln161, Leu162, Val163, Gly164, Leu165, Lys200, His201, Glu233, Asp300, His305, Asp356 |
| NINAHSVVY        | Trp59, Gln63, His101, Tyr151, Val163, Asp197, Lys200, His201, Glu233, Ile235, Asp300, His305, Ala307                                |
| RLARAGLAQ        | Asn53, Trp59, Gln63, Ser105, Gly106, Gln161, Val163, Arg195, Asp197, His201, His299, Asp300, Asp356                                 |
| IPLPLPLPLP       | Val50, Val51, Thr52, Asn53, Trp59, Gln63, His101, Asp197, Asp300, His305                                                            |
| LRSELAAWSR       | Trp58, Gln63, His101, Tyr151, Val163, Asp197, Lys200, His201, Ile235, His299, Asp300, His305, Ala307, Gly308, Gly309, Asp356        |
| YFDEQNEQFR       | Asn53, Trp59, Tyr62, Gln63, Ser105, Gly106, Ala107, Tyr151, Leu162, Val163, Lys200, His201, His299, Asp300, His305, Asp356          |
| YGNPVGGVGH       | Thr6, Ser8, Gly9, Arg252, Trp280, Glu282, Ser289, His331, Pro332, Gly334, Arg398, Asp402, Gly403, Arg421                            |
| GQLGEHGGAGMG     | Trp59, Tyr62, Gln63, Ile148, Val163, Arg195, Asp197, His201, Glu233, Ile235, Asp300, His305, Ala307, Glu352, Val354, Asp356         |
| EQGFLPGPEESGR    | Trp59, Gln63, Ile148, Glu149, Tyr151, Val163, Lys200, His201, Ile235, Gly306, Ala307                                                |
| GNPVGGVGHGTTGT   | Trp59, Tyr62, Gln63, His101, Tyr151, Leu162, Val163, Arg195, Asp197, His201, His299, Asp300, His305, Gly306, Gly308, Gly309, Asp356 |
| GEHGGAGMGGGQFQPV | Gln63, His101, Ile148, Tyr151, Val163, Arg195, Asp197, Lys200, His201, Glu233, His299, Asp300, His305, Ala307                       |
| HAGPTWNPISIGISFM | Pca1, Tyr2, Ala3, Gln5, Thr11, Ser226, Arg227, Arg252, Ser289, Asp290, Arg291, Pro332, Asp402, Phe406                               |
| LSSLEMGSLGALFVCM | Pro54, Trp59, Thr264, Ser270, Glu272, His299, Asp300, His305, Gly306, Ala307, Gly308, Gly309, Ser310, Ser311, Asp356                |

**Table S3.** The sites and lengths of the hydrogen bonds between the peptides and  $\alpha$ -amylase.

| Peptide    | Peptide length | Site on enzyme molecule | Site on peptide molecule | Length of hydrogen bond (Å) |
|------------|----------------|-------------------------|--------------------------|-----------------------------|
| EAGVD      | 5              | Gln63                   | E1                       | 2.2                         |
|            |                | Arg195                  | D5                       | 2.2                         |
|            |                | Asp197                  | D5                       | 3                           |
|            |                | His299                  | D5                       | 1.9                         |
|            |                | His299                  | D5                       | 2.5                         |
|            |                | Arg195                  | F5                       | 2.6                         |
| KLPGF      | 5              | Asp197                  | F5                       | 3.4                         |
|            |                | His201                  | P3                       | 2.2                         |
|            |                | Glu233                  | F5                       | 3.4                         |
|            |                | His299                  | F5                       | 1.8                         |
|            |                | Asp300                  | K1                       | 3.2                         |
|            |                | Lys200                  | P6                       | 2                           |
| PPHMLP     | 6              | His201                  | H3                       | 2.6                         |
|            |                | Glu240                  | P6                       | 3.4                         |
|            |                | Glu240                  | P6                       | 3.5                         |
| PPHMGGP    | 7              | His201                  | H3                       | 2.4                         |
|            |                | Asp356                  | P7                       | 3.3                         |
| LPLPLPLR   | 8              | Asn152                  | R8                       | 3.4                         |
|            |                | Lys200                  | R6                       | 1.9                         |
|            |                | Arg252                  | H5                       | 2.5                         |
|            |                | Arg252                  | H5                       | 2.7                         |
| PLPLHMLP   | 8              | Arg252                  | L7                       | 2.7                         |
|            |                | Trp280                  | P1                       | 3.3                         |
|            |                | Ser289                  | L2                       | 2.4                         |
|            |                | Arg291                  | P8                       | 2.2                         |
|            |                | Arg195                  | F8                       | 2.1                         |
|            |                | Arg195                  | F8                       | 2.4                         |
|            |                | Asp197                  | F8                       | 3.2                         |
|            |                | His201                  | A6                       | 2.5                         |
| PLPWGAGF   | 8              | Glu233                  | F8                       | 3.4                         |
|            |                | Asp300                  | F8                       | 3.2                         |
|            |                | His101                  | D6                       | 2.5                         |
|            |                | Ile148                  | R1                       | 3.4                         |
|            |                | Gln161                  | R1                       | 3.4                         |
|            |                | Gln161                  | R1                       | 3.4                         |
| NINAHSVVY  | 9              | —                       | —                        | —                           |
| RLARAGLAQ  | 9              | Asp356                  | R4                       | 3.3                         |
|            |                | Thr52                   | P10                      | 2.2                         |
|            |                | Thr52                   | P10                      | 2.5                         |
| IPLPLPLPLP | 10             | Thr52                   | P10                      | 2.9                         |
|            |                | Asn53                   | P10                      | 3.5                         |
|            |                | Asp300                  | I1                       | 3.5                         |
|            |                | Gln63                   | W8                       | 1.8                         |
|            |                | Gln63                   | S9                       | 2.6                         |
| LRSELAAWSR | 10             | His305                  | R2                       | 1.8                         |
|            |                | Gly308                  | E4                       | 2.2                         |
|            |                | Asp356                  | R10                      | 3.5                         |
|            |                | Asn53                   | Y1                       | 3.5                         |
|            |                | Gln63                   | E4                       | 1.9                         |
|            |                | Gly106                  | D3                       | 2.2                         |
| YFDEQNEQFR | 10             | Ala107                  | D3                       | 2.8                         |
|            |                | Tyr151                  | R10                      | 2.9                         |
|            |                | His201                  | R10                      | 2.1                         |

|                |    |        |     |     |
|----------------|----|--------|-----|-----|
|                |    | His305 | R10 | 3.3 |
|                |    | Asp356 | N6  | 3.5 |
|                |    | Gly9   | G6  | 2.3 |
|                |    | Arg252 | N3  | 2   |
|                |    | Arg252 | N3  | 2.5 |
| YGNPVGGVGH     | 10 | Arg252 | H10 | 2.4 |
|                |    | Arg252 | H10 | 2.5 |
|                |    | Trp280 | Y1  | 3.3 |
|                |    | Glu282 | Y1  | 3.5 |
|                |    | Ser289 | Y1  | 2.2 |
|                |    | Trp59  | G10 | 2.3 |
| GQLGEHGGAGM    |    | Gln63  | G8  | 2.2 |
| G              | 12 | His201 | H6  | 2.3 |
|                |    | Val354 | G12 | 3.3 |
| EQGFLPGPEESGR  | 13 | Asp356 | G12 | 3.3 |
|                |    | Gln63  | E1  | 2.2 |
|                |    | His101 | G8  | 2.5 |
|                |    | Tyr151 | G10 | 2.6 |
| GNPVGGVGHGTT   |    | His201 | H9  | 2.6 |
| GT             | 14 | His305 | V4  | 2.7 |
|                |    | Gly306 | T14 | 3.2 |
|                |    | Gly306 | T14 | 3.3 |
|                |    | Gly308 | T14 | 2.1 |
| GEHGGAGMGGG    |    | Gln63  | E2  | 2.2 |
| QFQPV          | 16 | His101 | E2  | 2.6 |
|                |    | Tyr151 | G4  | 2.7 |
|                |    | Pca1   | M16 | 3.3 |
|                |    | Tyr2   | A2  | 2   |
| HAGPTWNPISIGIS |    | Ala3   | A2  | 2.1 |
| FM             | 16 | Arg291 | S14 | 2.4 |
|                |    | Arg291 | S14 | 2.5 |
|                |    | Asp402 | W6  | 3.3 |
|                |    | Trp59  | S2  | 2.6 |
|                |    | Asp300 | E5  | 3.5 |
| LSSLEMGSLGALF  |    | Gly305 | G7  | 2   |
| VCM            | 16 | Gly305 | S3  | 2.8 |
|                |    | Gly306 | M16 | 3.1 |
|                |    | Gly306 | M16 | 3.3 |
|                |    | Gly308 | M16 | 2.4 |
|                |    | Ser310 | A11 | 2.5 |
|                |    | Ser311 | A11 | 2.2 |
